# Supplementary material
Source: ML conference proceedings conference paper supplement (https://openreview.net/forum?id=-qPznNJmVxx)
Supplement: supplementary_material [file attachment]

**(1) Example of the web interface that participants saw during the informal formative study**

(A)

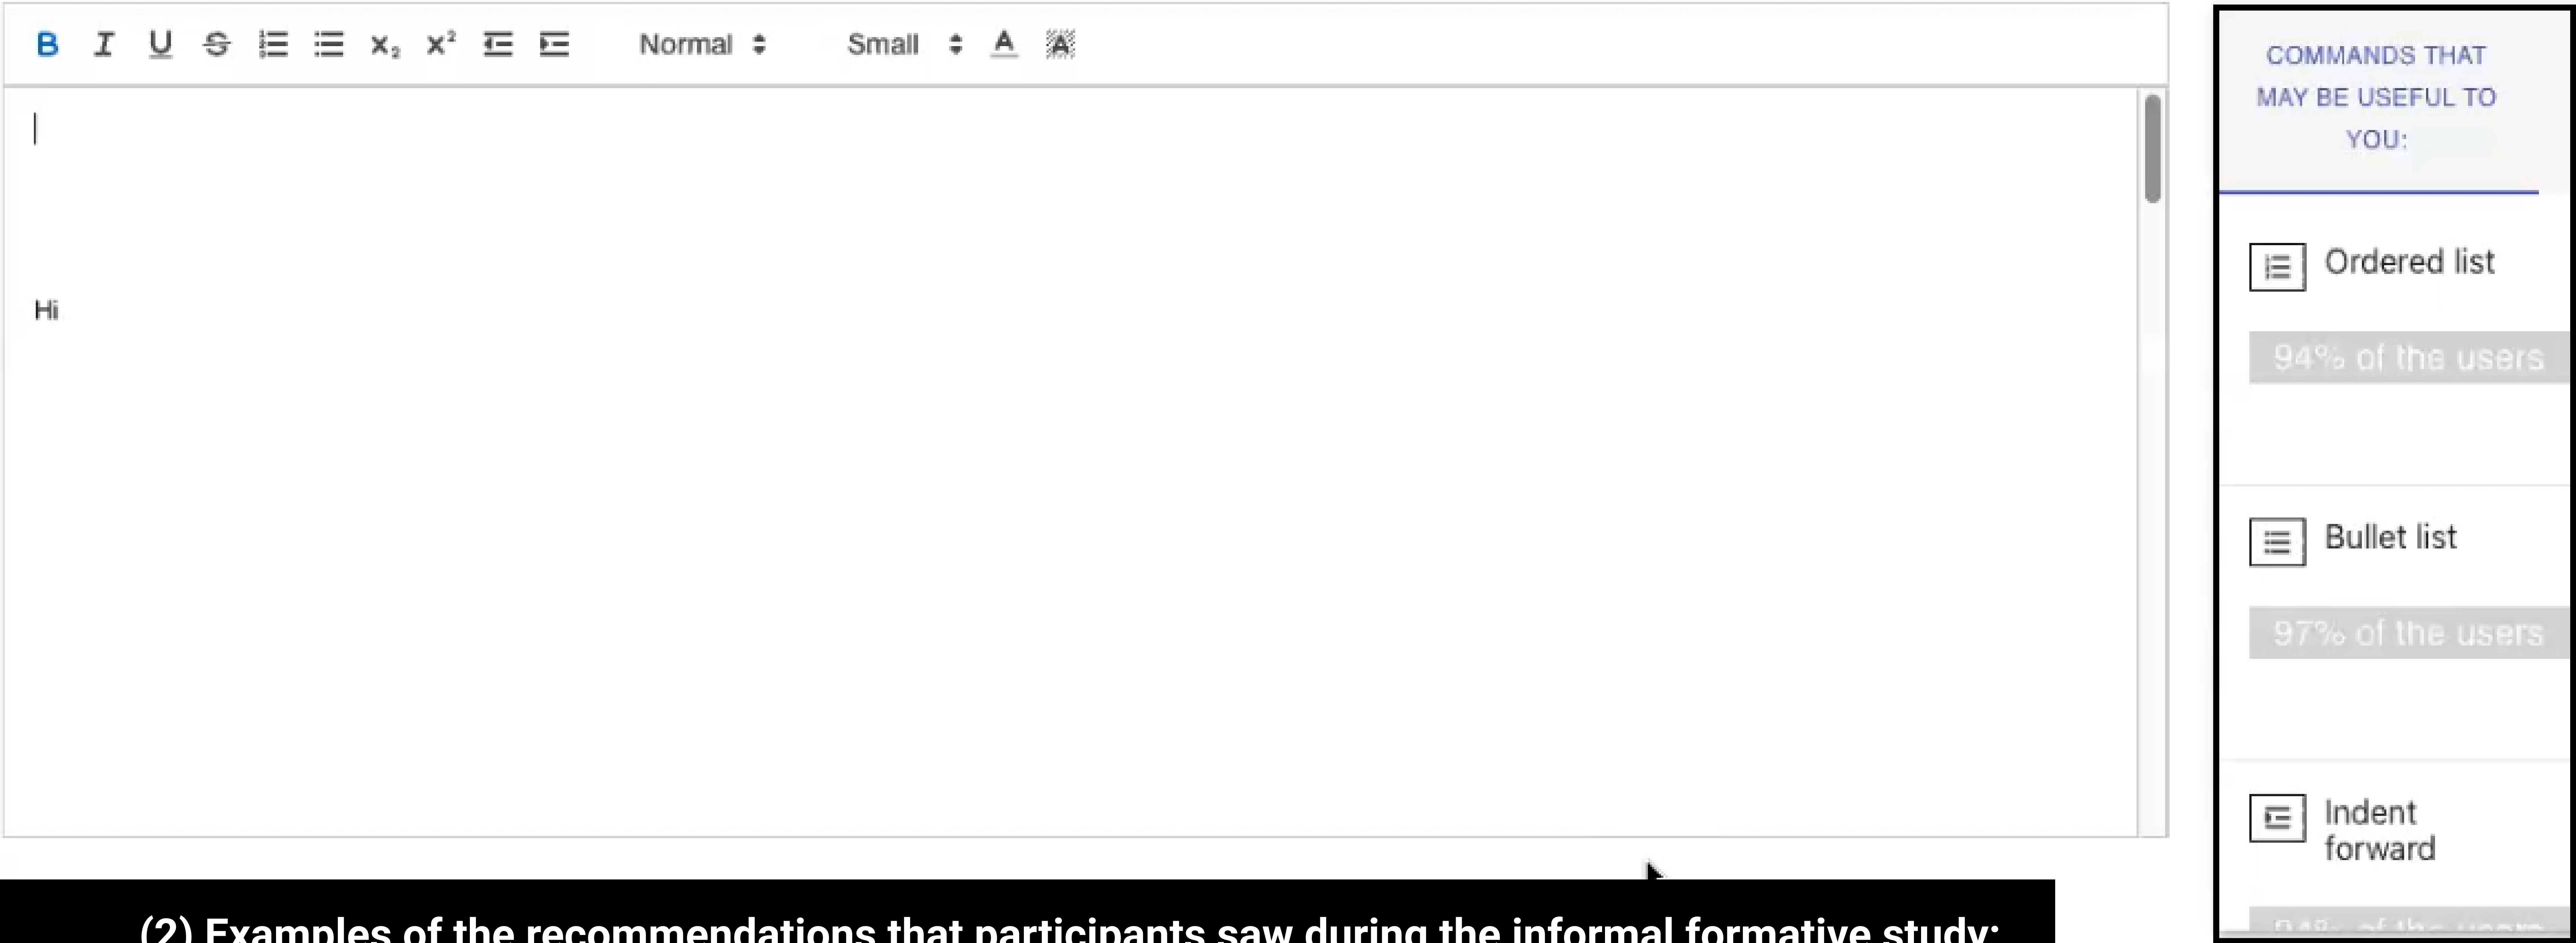

**(2) Examples of the recommendations that participants saw during the informal formative study:**

### (B) Crowd-powered recommendations

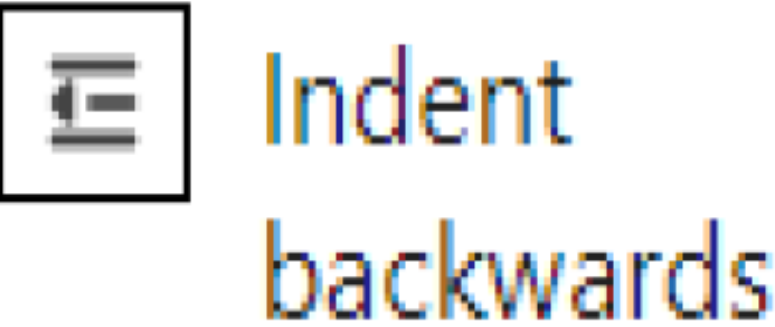

**(C) Collaborator-based recommendations/  
individuals are not identifiable**

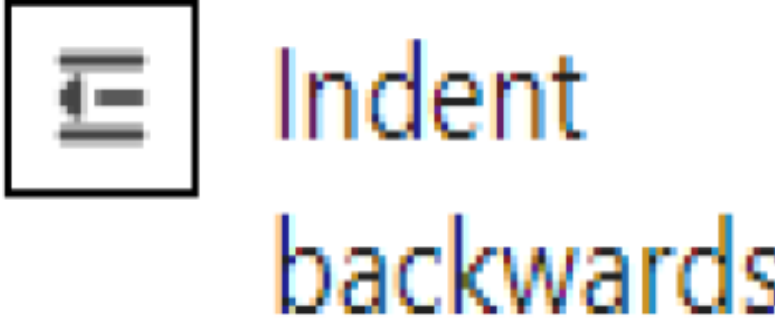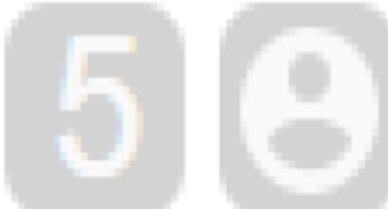

**(D) Collaborator-based recommendations/individuals are identifiable**

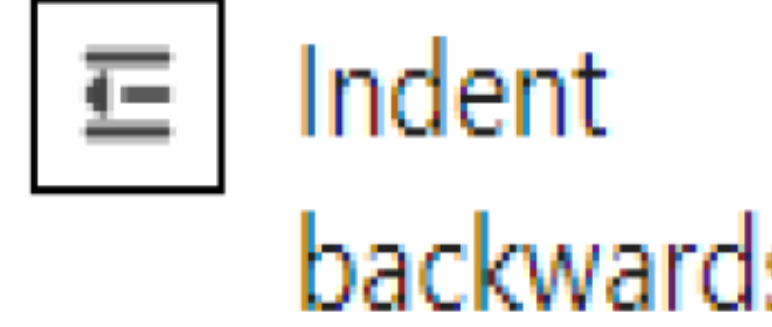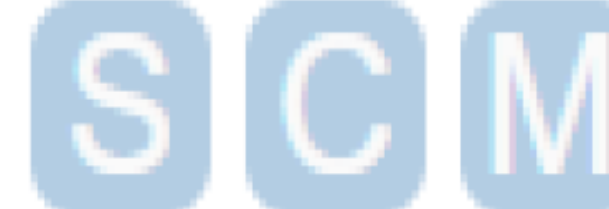

(1) The web interface that participants saw during the informal formative study. In the panel on the right (A) participants saw the different recommendation messages

(2) Examples of the recommendations that participants saw. The recommendations differ in terms of i) the user community from which the recommendations are derived from crowd-powered recommendations (B) or from the user's collaborators on a shared document (B & C) and ii) whether the user's collaborators are directly identifiable in individual recommendations (C) or not (B)
