# Supplementary material
Source: ML conference proceedings conference paper supplement (https://openreview.net/forum?id=-qPznNJmVxx)
Supplement: supplementary_material [file attachment]

This folder contains the following files:

**ScreeningSurveyFormativeStudy.pdf:** The survey we used to recruit participants in the formative study.

**FormativeStudyInterfaceAndRecommendationMessages.pdf:** A screenshot of the web interface we used in the formative study and examples of the recommendations that participants saw during the informal formative study.

**NewsFeat.mp4:** Video prototype for the NewsFeat design concept as seen by the participants.

**CommandMeter.mp4:** Video prototype for the CommandMeter design concept as seen by the participants.

**CollabCommands.mp4:** Video prototype for the CollabCommands design concept as seen by the participants.

**CollabPatina.mp4:** Video prototype for the CollabPatina design concept as seen by the participants.

**MostFrequentKS.mp4:** Video prototype for the MostFrequentKS design concept as seen by the participants.

**ScreeningSurveyElicitationStudy.pdf:** The survey we used to recruit participants in the elicitation study
