# Supplementary material
Source: ML conference proceedings conference paper supplement (https://openreview.net/forum?id=-qPznNJmVxx)
Supplement: supplementary_material [file attachment]

### Default Question Block

We are recruiting for an interview study on serendipitous software feature discovery. Please complete the survey and we will contact you in case you are selected. Thank you in advance for your time.

There are no right or wrong answers in this survey. Our goal is to recruit a varied set of participants.

During the study, we will show you a series of systems and solicit your feedback.

The study will be conducted remotely using video conferencing tools and we will video record the session. The duration of the study will be around 1 hour and the compensation is \$15.

How old are you?

How would you describe your gender?

- ☐ Male
- ☐ Female
- ☐ Non-binary / third gender
- ☐ Prefer not to say
- ☐ Other

What is your main occupation

How often do you use collaborative editors (like Microsoft office suite, Google drive suite)

- ☐ Never
- ☐ Rarely (1-2 times per month)
- ☐ Sometimes (1-2 times per week)
- ☐ Often (1-2 times per week)
- ☐ Frequently (a few times per week)

How often do you collaborate with others using collaborative editors

- ☐ Never
- ☐ Rarely (1-2 times per month)
- ☐ Sometimes (1-2 times per week)
- ☐ Often (1-2 times per week)
- ☐ Frequently (a few times per week)

On average, when you work on a shared document, how many people typically participate in actively editing the document?

What is your email address? (We will use it to contact you in case you are recruited for the study)

Powered by Qualtrics
