# Supplementary material
Source: ML conference proceedings conference paper supplement (https://openreview.net/forum?id=-qPznNJmVxx)
Supplement: supplementary_material [file attachment]

### Default Question Block

We are recruiting participants for an interview study on real-time collaborative editors like Google docs. If you are interested in participating, please fill the following survey, and we will get back to you in case you are selected.

Please note that there are no right and wrong answers in this survey: we are looking for a varied set of participants.

We will conduct the interview remotely through video call, where we will show you a set of interactive prototypes over video chat. Then we will ask you questions regarding the prototypes. We will audio and video record the session. The study will last approximately 60 minutes, and the compensation is 15 CAD

What gender do you identify as?

☐ Male

☐ Female

☐ Other:

☐ Prefer not to say

What is your age?

What is your profession?

Have you collaborated with colleagues/friends using a remote collaborative editor (e.g., Google Docs, Miro, Etherpad, MS OneNote, etc.) in the last 2 years?

if yes, how often are you using remote collaborative editor applications?

daily  
☐

weekly  
☐

monthly  
☐

yearly  
☐

N/A  
☐

What is your email address? We will only use it to contact you in case you are recruited for the study.

Block 1

---

Powered by Qualtrics
